# Supplementary material for: Osteoradionecrosis of the Jaws Due to Teeth Extractions during and after Radiotherapy: A Systematic Review
Source: MDPI journal article supplement (doi:10.3390/cancers13225798), 2021-11-18
Supplement: s1 [file s1]

## ELECTRONIC MATERIALS

**File S1.** Modified Newcastle-Ottawa quality assessment tool forms for case control

studies and cohort studies.

### MODIFICATION OF NEWCASTLE NEWCASTLE - OTTAWA QUALITY ASSESSMENT SCALE - CASE CONTROL STUDIES

Note: A study can be awarded a maximum of one star for each numbered item within the Selection and Exposure categories. A maximum of two stars can be given for Comparability.

#### **Selection**

- 1) Is the case definition adequate?
  - a) yes, with independent validation ♣
  - b) yes, e.g. record linkage or based on self reports
  - c) no description
- 2) Representativeness of the cases
  - a) consecutive or obviously representative series of cases ♣
  - b) potential for selection biases or not stated
- 3) Selection of Controls
  - a) community controls ♣
  - b) hospital controls
  - c) no description
- 4) Definition of Controls
  - a) no history of disease (tooth extraction) ♣
  - b) no description of source

#### **Comparability**

- 1) Comparability of cases and controls on the basis of the design or analysis
  - a) study controls for Tooth extraction ♣
  - b) study controls for any additional factor (Field of Radiation, Timing, Extraction Protocol, Reason for Tooth Extraction) ♣

#### **Exposure**

- 1) Ascertainment of exposure
  - a) secure record (e.g. surgical records) ♣
  - b) structured interview where blind to case/control status ♣
  - c) interview not blinded to case/control status
  - d) written self report or medical record only
  - e) no description
- 2) Same method of ascertainment for cases and controls
  - a) yes ♣

b) no

3) Non-Response rate

a) same rate for both groups ♣

b) non respondents described

c) rate different and no designation

## MODIFICATION OF NEWCASTLE - OTTAWA QUALITY ASSESSMENT SCALE - COHORT STUDIES

Note: A study can be awarded a maximum of one star for each numbered item within the Selection and Outcome categories. A maximum of two stars can be given for Comparability

### Selection

#### 1) Representativeness of the exposed cohort

- a) truly representative of the average of patients with history of head & neck cancer who undergo radiotherapy ✱
- b) somewhat representative of the average of patients with history of head & neck cancer who undergo radiotherapy ✱
- c) selected group of users e.g. nurses, volunteers
- d) no description of the derivation of the cohort

#### 2) Selection of the non exposed cohort

- a) drawn from the same community as the exposed cohort ✱
- b) drawn from a different source
- c) no description of the derivation of the non exposed cohort

#### 3) Ascertainment of exposure

- a) secure record (e.g. surgical records) ✱
- b) structured interview ✱
- c) written self report
- d) no description

#### 4) Demonstration that outcome of interest was not present at start of study

- a) yes ✱
- b) no

### Comparability

#### 1) Comparability of cohorts on the basis of the design or analysis

- a) study controls for extraction ✱
- b) study controls for any additional relevant factor (field of radiation, timing, extraction protocol, reason for tooth extraction) ✱

### Outcome

#### 1) Assessment of outcome

- a) independent blind assessment ✱
- b) record linkage ✱
- c) self report
- d) no description

#### 2) Was follow-up long enough for outcomes to occur

- a) yes (6 months from tooth extraction) ✱
- b) no

#### 3) Adequacy of follow up of cohorts

- a) complete follow up (at least 6 months) - all subjects accounted for ✱
- b) subjects lost to follow up unlikely to introduce bias - small number lost - > 75 % (select an adequate %) follow up, or description provided of those lost) ✱
- c) follow up rate < 75 (select an adequate %) and no description of those lost

d) no statement

**Table S1.** Articles excluded from systematic review and reasons for their exclusions.

| Article            | Reason for exclusion                                                                                 |
|--------------------|------------------------------------------------------------------------------------------------------|
| Murray CG, 1980    | No information about the number of patients undergoing tooth extractions                             |
| Murray CG, 1980    | No/Incomplete definition of ORN is given                                                             |
| Murray CG, 1980    | Case report                                                                                          |
| Beumer J, 1981     | Review                                                                                               |
| Horiot JC, 1981    | No/Incomplete definition of ORN is given                                                             |
| Coffin F. 1983.    | No information about the number of patients undergoing tooth extractions                             |
| Horiot JC, 1983    | No/Incomplete definition of ORN is given                                                             |
| Marciani RD, 1986. | Review                                                                                               |
| Makkonen TA, 1987  | No/Incomplete definition of ORN is given                                                             |
| Epstein JB, 1987   | Cohort of patients not representative of the whole patients undergoing tooth extractions prior to RT |
| Schweiger JW. 1987 | Unhealed sockets followed up for less than 3 months                                                  |
| Kluth EV, 1988     | Cohort of patients not representative of the whole patients undergoing tooth extractions prior to RT |
| Patel P, 1989      | No/Incomplete definition of ORN is given                                                             |
| Levendag PC, 1989  | No/Incomplete definition of ORN is given                                                             |
| Widmark G, 1989    | Cohort of patients not representative of the whole patients undergoing tooth extractions prior to RT |
| Brown RS1, 1990    | No/Incomplete definition of ORN is given                                                             |
| Reed JR. 1991      | Less than 10 patients receive tooth extraction after RT                                              |
| Katsikeris N, 1992 | Letter to the editor                                                                                 |

|                     |                                                                                                             |
|---------------------|-------------------------------------------------------------------------------------------------------------|
| Ashamalla HL, 1996  | Less than 10 patients receive tooth extraction after RT                                                     |
| Niewald M, 1996     | No information about the number of patients undergoing tooth extractions                                    |
| Roos DE, 1996       | No clinical evaluation of the outcome ORN                                                                   |
| Clayman L. 1997     | Review                                                                                                      |
| Curi MM, 1997       | Cohort of patients not representative of the whole patients undergoing tooth extractions prior to RT        |
| Epstein J, 1997     | Cohort of patients not representative of the whole patients undergoing tooth extractions prior to RT        |
| Carl W, 1998        | Less than 10 patients receive tooth extraction after RT                                                     |
| Tong AC, 1999       | Insufficient follow-up                                                                                      |
| Vudiniabola S, 1999 | It is not specified if ORN followed post-RT tooth extractions. No data regarding patients who developed ORN |
| Thorn JJ, 2000.     | Cohort of patients not representative of the whole patients undergoing tooth extractions prior to RT        |
| Chavez JA, 2001.    | No/Incomplete definition of ORN is given                                                                    |
| Cramer CK, 2002     | No clinical study                                                                                           |
| Sulaiman F, 2003    | No/Incomplete definition of ORN is given                                                                    |
| T. Reuther, 2003    | Cohort of patients not representative of the whole patients undergoing tooth extractions prior to RT        |
| Adkinson C, 2005    | Cohort of patients not representative of the whole patients undergoing tooth extractions prior to RT        |
| Bonan PR, 2006.     | No/Incomplete definition of ORN is given                                                                    |
| Cheng SJ, 2006      | Cohort of patients not representative of the whole patients undergoing tooth extractions prior to RT        |

|                              |                                                                                                      |
|------------------------------|------------------------------------------------------------------------------------------------------|
| Studer G, 2006               | No information about the number of patients undergoing tooth extractions                             |
| Chang DT, 2007               | Less than 10 patients receive tooth extraction after RT                                              |
| Goldwaser BR, 2007           | No information about the number of patients undergoing tooth extractions                             |
| Lye KW, 2007                 | Insufficient follow-up                                                                               |
| Chang DT, 2007               | It is not specified if ORN followed post-RT tooth extractions                                        |
| Harding SA, 2008             | No clinical study                                                                                    |
| Jham BC, 2008.               | Insufficient follow-up                                                                               |
| Katsura K, 2008              | No information about the number of patients undergoing tooth extractions                             |
| Koga DH, 2008                | No/Incomplete definition of ORN is given                                                             |
| Sennhenn-Kirchner S, 2009    | No information about the number of patients undergoing tooth extractions                             |
| Kaur J, 2009                 | No clinical study                                                                                    |
| Oh HK, 2009                  | Cohort of patients not representative of the whole patients undergoing tooth extractions prior to RT |
| Escoda-Francolí J, 2011      | Less than 10 patients receive tooth extraction after RT                                              |
| Gomez, D.R., 2011            | No/Incomplete definition of ORN is given                                                             |
| Schuurhuis JM, 2011.         | No information about the number of patients undergoing tooth extractions after RT                    |
| Chopra S, 2011.              | Cohort of patients not representative of the whole patients undergoing tooth extractions prior to RT |
| Chiaojung Jillian Tsai, 2012 | Less than 10 patients receive tooth extraction after RT                                              |
| Thariat J, 2012              | No clinical study                                                                                    |

|                             |                                                                                                                  |
|-----------------------------|------------------------------------------------------------------------------------------------------------------|
| Duarte et al. 2013          | It is not specified if ORN followed post-RT tooth extractions                                                    |
| Niewald M, 2013             | Unclear number of post-RT tooth extraction                                                                       |
| Heyboer M 3rd, 2013         | No/Incomplete definition of ORN is given                                                                         |
| Mozzati M, 2014             | Insufficient follow-up                                                                                           |
| Walter C, 2014              | It is not specified if ORN followed post-RT tooth extractions                                                    |
| Chronopoulos A, 2015        | Cohort of patients not representative of the whole patients undergoing tooth extractions prior to RT             |
| Raguse J-D, 2015            | No/Incomplete definition of ORN is given                                                                         |
| De Felice F, 2016           | Cohort of patients not representative of the whole patients undergoing tooth extractions prior to RT             |
| De Maesschalck et al. 2016  | It is not specified if ORN followed post-RT tooth extractions                                                    |
| Kuhnt T, 2016               | No information about the number of patients undergoing tooth extractions after RT                                |
| Kuo TJ, 2016                | Only ORN with moderate and severe pain were diagnosed                                                            |
| Owosho 2016                 | Cohort of patients not representative of the whole patients undergoing tooth extractions prior to RT             |
| Gallegos-Hernández JF, 2016 | No information about the number of patients undergoing tooth extractions after RT                                |
| Wanifuchi S, 2016           | Cohort of patients not representative of the whole patients undergoing tooth extractions prior to RT             |
| Caparrotti F, 2017          | No information about the number of patients undergoing tooth extractions after RT                                |
| Kojima Y, 2017.             | Unclear follow-up                                                                                                |
| Lai TY, 2017                | Tooth extractions were conducted even on patients who have not received RT. Impossible to evaluate the ORN rate. |



|                |                                                                                   |
|----------------|-----------------------------------------------------------------------------------|
| Lalla RV, 2017 | Ongoing Study                                                                     |
| Moon DH, 2017  | No information about the number of patients undergoing tooth extractions after RT |
| Beech NM, 2017 | Cross-sectional study                                                             |

**Table S2.** Details of reported ORN Patients. Gender, Age and Tumor Site of ORN Patients are not reported because only few data were retrieved.

| Author                    | ORN Patients | Dose (Gy) <sup>1</sup> | Time RT/EXT  | ORN Site            | Preventive Measures |
|---------------------------|--------------|------------------------|--------------|---------------------|---------------------|
| Morrish 1981 <sup>3</sup> | 1            | 73 <sup>2</sup>        | NA           | Mandible            | none                |
|                           | 2            | 73 <sup>2</sup>        | NA           | Mandible            | none                |
|                           | 3            | 73 <sup>2</sup>        | NA           | Mandible            | none                |
|                           | 4            | 73 <sup>2</sup>        | NA           | Mandible            | none                |
|                           | 5            | 73 <sup>2</sup>        | NA           | Mandible            | none                |
|                           | 6            | 73 <sup>2</sup>        | NA           | Mandible            | none                |
|                           | 7            | 73 <sup>2</sup>        | NA           | Mandible            | none                |
|                           | 8            | 73 <sup>2</sup>        | NA           | Mandible            | none                |
|                           | 9            | 73 <sup>2</sup>        | NA           | NA <sup>3</sup>     | none                |
| Beumer 1983               | 10           | NA                     | 13-24 months | Maxilla             | none                |
|                           | 11           | NA                     | 13-24 months | Maxilla             | none                |
|                           | 12           | NA                     | 13-24 months | Maxilla             | none                |
|                           | 13           | NA                     | NA           | Mandible (anterior) | none                |
|                           | 14           | NA                     | NA           | Mandible (anterior) | none                |
|                           | 15           | NA                     | NA           | Mandible (premolar) | none                |
|                           | 16           | NA                     | NA           | Mandible (premolar) | none                |
|                           | 17           | NA                     | NA           | Mandible (premolar) | none                |

|           |    |                 |    |                        |                                          |
|-----------|----|-----------------|----|------------------------|------------------------------------------|
| Marx 1985 | 18 | NA              | NA | Mandible<br>(premolar) | none                                     |
|           | 19 | NA              | NA | Mandible<br>(premolar) | none                                     |
|           | 20 | NA              | NA | Mandible<br>(premolar) | none                                     |
|           | 21 | NA              | NA | Mandible (molar)       | none                                     |
|           | 22 | NA              | NA | Mandible (molar)       | none                                     |
|           | 23 | NA              | NA | Mandible (molar)       | none                                     |
|           | 24 | NA              | NA | Mandible (molar)       | none                                     |
|           | 25 | NA              | NA | Mandible (molar)       | none                                     |
|           | 26 | 68 <sup>2</sup> | NA | Mandible               | HBO                                      |
|           | 27 | 68 <sup>2</sup> | NA | Mandible               | HBO                                      |
|           | 28 | 68 <sup>2</sup> | NA | Mandible               | Penicillin V<br>+Phenoxymethylpenicillin |
|           | 29 | 68 <sup>2</sup> | NA | Mandible               | Penicillin V<br>+Phenoxymethylpenicillin |
|           | 30 | 68 <sup>2</sup> | NA | Mandible               | Penicillin V<br>+Phenoxymethylpenicillin |
|           | 31 | 68 <sup>2</sup> | NA | Mandible               | Penicillin V<br>+Phenoxymethylpenicillin |
|           | 32 | 68 <sup>2</sup> | NA | Mandible               | Penicillin V<br>+Phenoxymethylpenicillin |
|           | 33 | 68 <sup>2</sup> | NA | Mandible               | Penicillin V<br>+Phenoxymethylpenicillin |
|           | 34 | 68 <sup>2</sup> | NA | Mandible               | Penicillin V<br>+Phenoxymethylpenicillin |

|              |    |                 |    |          |                                          |
|--------------|----|-----------------|----|----------|------------------------------------------|
| Epstein 1987 | 35 | 68 <sup>2</sup> | NA | Mandible | Penicillin V<br>+Phenoxymethylpenicillin |
|              | 36 | 68 <sup>2</sup> | NA | Mandible | Penicillin V<br>+Phenoxymethylpenicillin |
|              | 37 | 68 <sup>2</sup> | NA | Mandible | Penicillin V<br>+Phenoxymethylpenicillin |
|              | 38 | 68 <sup>2</sup> | NA | Mandible | Penicillin V<br>+Phenoxymethylpenicillin |
|              | 39 | 53 <sup>2</sup> | NA | Mandible | Antibiotic (NOS)                         |
|              | 40 | 53 <sup>2</sup> | NA | Mandible | Antibiotic (NOS)                         |
|              | 41 | 53 <sup>2</sup> | NA | Mandible | Antibiotic (NOS)                         |

Footnote:

- <sup>1</sup> At Cancer site
- <sup>2</sup> Mean
- <sup>3</sup> Among the nine ORN, eight surely developed in the mandible.
- NA: Not Available
- NOS: Not Otherwise Specified
